# Supplementary material for: Platinum–palladium alloy nanotetrahedra with tuneable lattice-strain for enhanced intrinsic activity
Source: Royal Society of Chemistry journal article supplement (doi:10.1039/d0cy01371d), 2020-01-01
Supplement: d0cy01371d1.pdf [file d0cy01371d1.pdf]

## Supporting Information

### Platinum-Palladium Alloy Nanotetrahedra with Tuneable Lattice-Strain for Enhanced Intrinsic Activity

Ruifang Miao<sup>a#</sup>, Fangfang Chang<sup>a#, \*</sup>, Mengyun Ren<sup>a</sup>, Xianhong He<sup>a</sup>, Lin Yang<sup>a\*</sup>, Xiaolei Wang<sup>b</sup> and Zhengyu Bai<sup>a\*</sup>

<sup>a</sup> Collaborative Innovation Center of Henan Province for Green Manufacturing of Fine Chemicals, Key Laboratory of Green Chemical Media and Reactions, Ministry of Education, School of Chemistry and Chemical Engineering, Henan Normal University, Xinxiang, Henan 453007, China. Email: changfangfang@htu.edu.cn; yanglin@htu.edu.cn; baizhengyu@htu.edu.cn

<sup>b</sup> Department of Chemical and Materials Engineering, University of Alberta, Edmonton, Alberta T6G 1H9, Canada.

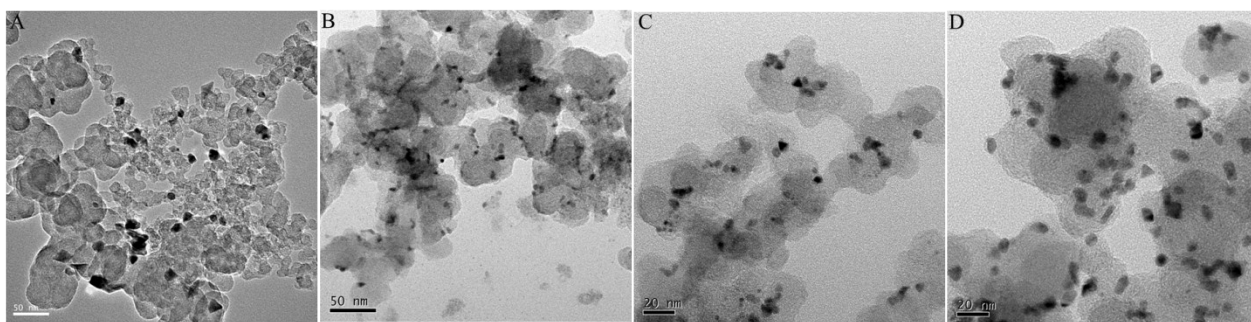

Fig. S1 TEM images of the nanotetrahedra samples ((A) Pt<sub>16</sub>Pd<sub>84</sub>/C, (B) Pt<sub>35</sub>Pd<sub>65</sub>/C, (C) Pt<sub>83</sub>Pd<sub>17</sub>/C and (D) Pt NPs/C).

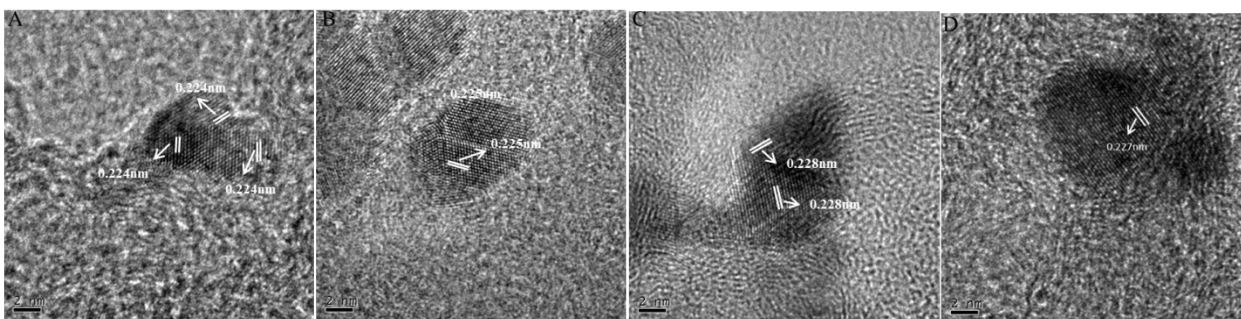

Fig. S2 HR-TEM images of the nanotetrahedra samples ((A) Pt<sub>16</sub>Pd<sub>84</sub>/C, (B) Pt<sub>35</sub>Pd<sub>65</sub>/C, (C) Pt<sub>83</sub>Pd<sub>17</sub>/C and (D) Pt NPs/C).

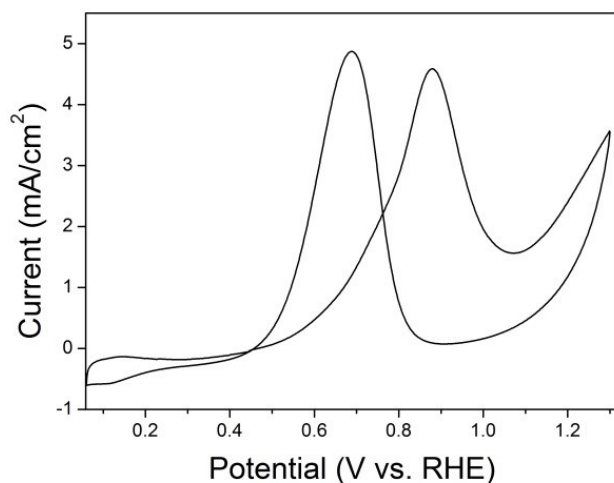

**Fig. S3** CV curve of commercial Pt/C in 0.1 M HClO<sub>4</sub> + 0.5 M CH<sub>3</sub>OH solution purged with N<sub>2</sub> at a scan rate of 50 mV s<sup>-1</sup>

Table S1 Comparison of MOR activities of various catalysts

| Catalyst                                             | Electrolyte                                                  | Mass Activity (A/mg <sub>Pt</sub> <sup>-1</sup> ) | Specific Activity(mA/cm <sup>2</sup> ) | Reference        |
|------------------------------------------------------|--------------------------------------------------------------|---------------------------------------------------|----------------------------------------|------------------|
| Pt <sub>75</sub> Pd <sub>25</sub> /rGO-CNTs          | 0.5 M H <sub>2</sub> SO <sub>4</sub> +1 M CH <sub>3</sub> OH | 1.01                                              | 5.4                                    | 1                |
| Pt <sub>60</sub> Pd <sub>40</sub> -GNP               | 0.5 M H <sub>2</sub> SO <sub>4</sub> +1 M CH <sub>3</sub> OH | 0.47                                              | 0.263                                  | 2                |
| PtPdCu-TiN                                           | 0.5M H <sub>2</sub> SO <sub>4</sub> +0.5M CH <sub>3</sub> OH | 0.37                                              | 0.48                                   | 3                |
| PtPd-TiN                                             | 0.5 M H <sub>2</sub> SO <sub>4</sub> +0.5 CH <sub>3</sub> OH | 0.2                                               | 0.27                                   | 4                |
| Pt <sub>3</sub> Pd <sub>1</sub> -CeO <sub>2</sub> /C | 0.5 M HClO <sub>4</sub> +1 M CH <sub>3</sub> OH              | 0.853                                             | 2.05                                   | 5                |
| <b>Pt<sub>62</sub>Pd<sub>38</sub>/C</b>              | 0.1M HClO <sub>4</sub> +0.5 M CH <sub>3</sub> OH             | <b>1.31</b>                                       | <b>0.57</b>                            | <b>This work</b> |

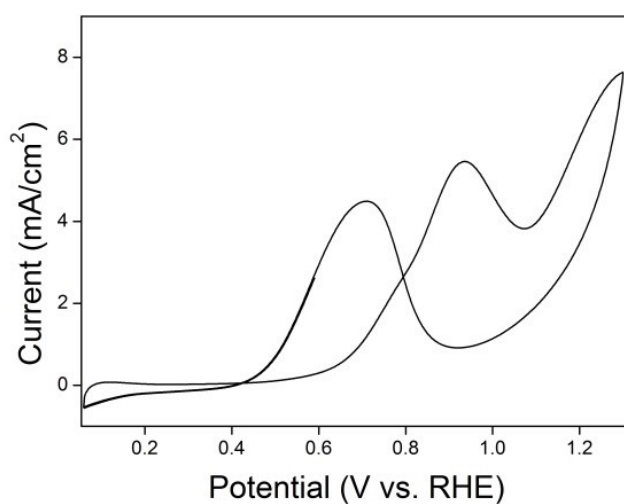

**Fig. S4** CV curves of commercial Pt/C in 0.1 M HClO<sub>4</sub> + 0.5 M C<sub>2</sub>H<sub>5</sub>OH solution purged with N<sub>2</sub> at a scan rate of 50 mV s<sup>-1</sup>

Table S2 Comparison of MOR activities of various catalysts

| Catalyst                                           | Electrolyte                                                                | Mass activity ( $A/mg_{Pt}^{-1}$ ) | Specific activity( $mA/cm^2$ ) | Reference        |
|----------------------------------------------------|----------------------------------------------------------------------------|------------------------------------|--------------------------------|------------------|
| Pt <sub>73</sub> Pd <sub>27</sub> /C               | 0.5 M H <sub>2</sub> SO <sub>4</sub> +1 M C <sub>2</sub> H <sub>5</sub> OH | 0.482                              | 0.54                           | 6                |
| PtPd NPs                                           | 0.5 MH <sub>2</sub> SO <sub>4</sub> +0.5MC <sub>2</sub> H <sub>5</sub> OH  | 0.49                               | 1.12                           | 7                |
| Pt <sub>34</sub> Pd <sub>33</sub> Cu <sub>33</sub> | 0.1M HClO <sub>4</sub> +0.5MC <sub>2</sub> H <sub>5</sub> OH               | 0.19                               | 1.13                           | 8                |
| Pt <sub>1</sub> Pd <sub>5</sub> NC/RGO             | 0.5 M H <sub>2</sub> SO <sub>4</sub> +0.5MC <sub>2</sub> H <sub>5</sub> OH | 1.08                               | 2.31                           | 9                |
| Pt-Pd@TDI/rGO                                      | 0.1MHClO <sub>4</sub> +0.5MC <sub>2</sub> H <sub>5</sub> OH                | 1.5                                | 1.20                           | 10               |
| <b>Pt<sub>62</sub>Pd<sub>38</sub>/C</b>            | 0.1M HClO <sub>4</sub> +0.5MC <sub>2</sub> H <sub>5</sub> OH               | <b>1.2</b>                         | <b>0.87</b>                    | <b>This work</b> |

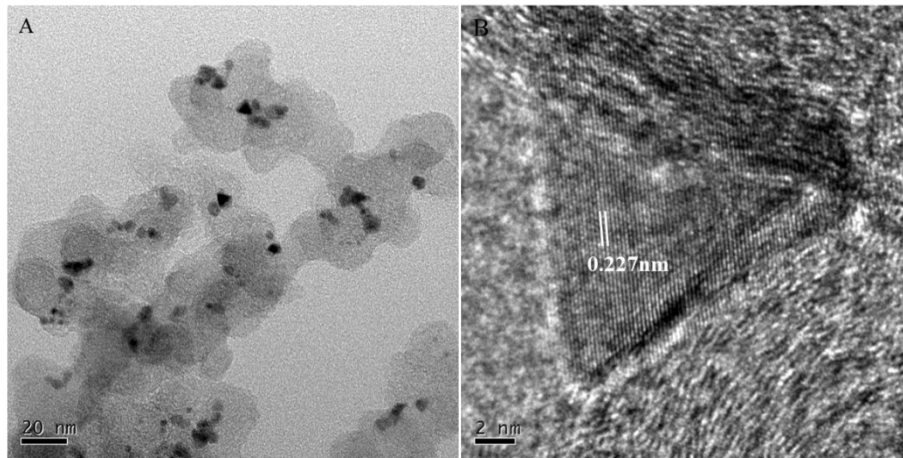

Fig. S5 TEM images of Pt<sub>62</sub>Pd<sub>38</sub>/C alloy NTDs after long-term durability

**Table S3. Structure, binding energy ( $E_{\text{binding}}$ ) and d-band center for Pt<sub>n</sub>Pd<sub>10-n</sub> clusters**

|                                 | Cluster                                                                            | $E_{\text{binding}}$ (eV) | d-band center (eV) |
|---------------------------------|------------------------------------------------------------------------------------|---------------------------|--------------------|
| Pt <sub>10</sub>                |   | 1.461                     | -1.125             |
| Pt <sub>8</sub> Pd <sub>2</sub> |   | 1.464                     | -1.048             |
| Pt <sub>6</sub> Pd <sub>4</sub> |   | 1.466                     | -0.856             |
| Pt <sub>3</sub> Pd <sub>7</sub> |   | 1.465                     | -0.801             |
| Pt <sub>1</sub> Pd <sub>9</sub> |   | 1.463                     | -0.365             |
| Pd <sub>10</sub>                |  | 1.462                     | -0.253             |

#### Reference

- 1 A. B. Yousaf, M. Imran, S. J. Zaidi and P. Kasak, *J. Electroanal. Chem.*, 2019, **832**, 343-352.
- 2 G. L. Zhang, C. D. Huang, R. J. Qin, Z. C. Shao, D. An, W. Zhang and Y. X. Wang, *J. Mater. Chem. A*, 2015, **3**, 5204-5211.
- 3 R. Chang, L. J. Zheng, C. W. Wang, D. C. Yang, G. X. Zhang and S. H. Sun, *Appl. Catal. B: Environ.*, 2017, **211**, 205-211.
- 4 M. X. Gong, X. Jiang, T. Y. Xue, T. Y. Shen, L. Xu, D. M. Sun and Y. W. Tang, *Catal. Sci. Technol.*, 2013, **00**, 1-3.
- 5 A. B. Yousaf, M. Imran, N. Uwitonze, A. Zeb, S. J. Zaidi, T. M. Ansari, G. Yasmeen and S. Manzoor, *J. Phys. Chem. C*, 2017, **121**, 2069-2079.
- 6 Q. Zhang, T. Chen, R. Y. Jiang and F. X. Jiang, *RSC Adv.*, 2020, **10**, 10134-10143.
- 7 P. T. Qiu, S. M. Lian, G. Yang and S. C. Yang, *Nano Rev.*, 2017, **10**, 1064-77.
- 8 J. Lan, K. Wang, Q. Yuan and X. Wang, *Mater. Chem. Front.*, 2017, **1**, 1217-22.
- 9 Y. Y. Zheng, J. H. Qiao, J. H. Yuan, J. F. Shen, A. J. Wang and S. T. Huang, *Inter. J. Hydrogen Energ.*, 2018, **43**, 4902-4911.
- 10 J. N. Tiwari, W. G. Lee, S. Sultan, M. Yousuf, A. M. Harzandi, V. Vij and K. S. Kim, *ACS Nano.*, 2017, **11**, 7729-7735.
